# Supplementary material
Source: MDPI journal article supplement (https://www.mdpi.com/1424-2818/15/2/279)
Supplement: s1 [file s1]

Archive with 6 entries (6 files):
- Figure S1.pdf
- Table S1 - PCR primers and protocols.pdf
- Table S2 - eDNA P.clarkii tank.pdf
- Table S3 - cuticle -swabs P.clarkii.pdf
- Table S4 - A.pallipes storing solution.pdf
- Table S5 - A.pallipes in field trial.pdf
